# Supplementary material for: Metabolic Syndrome and Autoimmune Diabetes: Action LADA 3
Source: Oxford University Press journal article supplement (doi:10.2337/dc08-1419), 2008-10-23
Supplement: dc081419-sup-action_lada_3appendix.doc [file dc081419-sup-action_lada_3appendix.doc]

Appendix 1. [online]

**Members of the Action LADA Group:**

Professor David Leslie, MD, Mr Mohammed Hawa BSc and Mr Yi Hao Loh, St Bartholomew’s and the London Hospital, Institute of Cell and Molecular Science

Professor Paolo Pozzilli MD, University Campus Bio-Medico, Rome

Professor Rhys Williams MD, FRCP, Dr Sinead Brophy PhD and Ms H Davies MSc, Swansea University, Swansea

Professor Henning Beck-Nielsen MD PhD, and Dr Knud Yderstraede MD, PhD, University Hospital of Odense, Odense

Dr Steven Hunter, MD and Professor David Hadden MD, Royal Victoria Hospital, Belfast

**Professor Raffaella Buzzetti MD, Sapienza, University of Rome**

Professor Werner Scherbaum MD and Professor Hubert Kolb, PhD, University of Düsseldorf, Düsseldorf

Dr Jochen Seissler, MD, Ludwig-Maximilians-University, Munich

Dr Nanette Schloot, MD German Diabetes Centre, University of Düsseldorf, Düsseldorf

Professor Guntram Schernthaner MD, Rudolfstiftung Hospital, Vienna

Professor Jaako Tuomilehto MD and Dr Cinzia Sarti MD, National Public Health Institute, Helsinki

Professor Alberto De Leiva PhD**,** Universitat Autonoma de Barcelona, Barcelona

Dr Didac Mauricio MD**,** Hospital de Sant Pau, Barcelona

Dr Eulalia Brugues MSc**,** Universitat Autonoma de Barcelona, Barcelona,

Professor Charles Thivolet, MD, Hopital Edouard Herriot, Lyon
